# Supplementary material for: Protective Effect of Leisure-Time Physical Activity and Resistance Training on Nonalcoholic Fatty Liver Disease: A Nationwide Cross-Sectional Study
Source: MDPI journal article supplement (doi:10.3390/ijerph19042350), 2022-02-18
Supplement: s1 [file s1]

**Table S1.** Odds ratios for NAFLD based on the amount of leisure-time PA per week and sex.

|                      | N       | NAFLD (%) | PA-time         | Model 1<br>OR (95% CI)           | Model 2<br>OR (95% CI)           | Model 3<br>OR (95% CI)           |
|----------------------|---------|-----------|-----------------|----------------------------------|----------------------------------|----------------------------------|
| <b>Total</b>         | 137,555 | 18.41     |                 |                                  |                                  |                                  |
| Non-PA               | 68,929  | 19.15     | 0.00            | 1 (reference) <sup>b</sup>       | 1 (reference) <sup>b</sup>       | 1 (reference) <sup>b</sup>       |
| Low-PA (< 150 min)   | 17,746  | 18.07     | 90.46 ± 32.29   | 0.92 (0.88–0.96) <sup>***</sup>  | 1.01 (0.96–1.06)                 | 0.97 (0.92–1.04)                 |
| Mid-PA (150–299 min) | 22,053  | 17.18     | 211.01 ± 30.33  | 0.83 (0.80–0.87) <sup>****</sup> | 0.91 (0.87–0.96) <sup>***</sup>  | 0.85 (0.81–0.90) <sup>****</sup> |
| High-PA (≥ 300 min)  | 28,827  | 17.79     | 500.61 ± 246.20 | 0.79 (0.77–0.82) <sup>****</sup> | 0.86 (0.82–0.90) <sup>****</sup> | 0.76 (0.72–0.80) <sup>****</sup> |
| <b>Men</b>           | 40,607  | 30.54     |                 |                                  |                                  |                                  |
| Non-PA               | 18,597  | 31.41     | 0.00            | 1 (reference) <sup>b</sup>       | 1 (reference) <sup>b</sup>       | 1 (reference) <sup>b</sup>       |
| Low-PA (< 150 min)   | 5642    | 31.04     | 88.69 ± 32.28   | 0.98 (0.92–1.05)                 | 0.96 (0.89–1.03)                 | 0.93 (0.84–1.01)                 |
| Mid-PA (150–299 min) | 6813    | 29.96     | 212.22 ± 33.22  | 0.93 (0.88–0.99) <sup>*</sup>    | 0.88 (0.82–0.94) <sup>***</sup>  | 0.84 (0.77–0.91) <sup>****</sup> |
| High-PA (≥ 300 min)  | 9555    | 28.95     | 529.94 ± 279.79 | 0.89 (0.84–0.94) <sup>****</sup> | 0.81 (0.76–0.86) <sup>****</sup> | 0.75 (0.70–0.81) <sup>****</sup> |
| <b>Women</b>         | 96,948  | 13.33     |                 |                                  |                                  |                                  |
| Non-PA               | 50,332  | 14.62     | 0.00            | 1 (reference) <sup>b</sup>       | 1 (reference) <sup>a</sup>       | 1 (reference) <sup>b</sup>       |
| Low-PA (< 150 min)   | 12,104  | 12.02     | 91.29 ± 32.27   | 0.84 (0.79–0.89) <sup>****</sup> | 0.99 (0.92–1.07)                 | 0.98 (0.90–1.07)                 |
| Mid-PA (150–299 min) | 15,240  | 11.47     | 210.47 ± 28.93  | 0.76 (0.71–0.80) <sup>****</sup> | 0.91 (0.85–0.97) <sup>**</sup>   | 0.86 (0.79–0.93) <sup>****</sup> |
| High-PA (≥ 300 min)  | 19,272  | 12.25     | 486.07 ± 226.33 | 0.78 (0.74–0.82) <sup>****</sup> | 0.92 (0.87–0.98) <sup>**</sup>   | 0.80 (0.75–0.86) <sup>****</sup> |

NAFLD, nonalcoholic fatty liver disease; PA, physical activity; PA-time, a total time participating regularly in any sports or exercise to the point of sweating; OR, odds ratio; CI, confidence interval; BMI, body mass index; WC, waist circumference; T-Chol, total cholesterol; ALT, alanine aminotransferase; \*,  $p < 0.05$ ; \*\*,  $p < 0.01$ ; \*\*\*,  $p < 0.001$ ; \*\*\*\*,  $p < 0.0001$ ; <sup>a</sup>,  $p < 0.01$  for the test for trend of ORs; <sup>b</sup>,  $p < 0.0001$  for the test for trend of ORs. Model 1 was adjusted for age and sex; Model 2 was adjusted for the variables in Model 1, plus drinking, smoking, education level, BMI, and WC; and Model 3 was adjusted for the variables in Model 2, plus T-Chol, ALT, hypertension, and diabetes mellitus.

**Table S2.** Characteristics of study participants based on leisure-time PA levels and regularity of RT.

| Variables                       | Low-PA (n = 86,675)    |                         | <i>p</i> -value | High-PA (n = 50,880)    |                            | <i>p</i> -value |
|---------------------------------|------------------------|-------------------------|-----------------|-------------------------|----------------------------|-----------------|
|                                 | Low-PA<br>(n = 82,588) | Low-PA+RT<br>(n = 4087) |                 | High-PA<br>(n = 40,362) | High-PA+RT<br>(n = 10,518) |                 |
| <b>Women</b> , n (%)            | 60,349 (73.07)         | 2087 (51.06)            | < 0.0001        | 28,170 (69.79)          | 6342 (60.30)               | < 0.0001        |
| <b>Age</b> (years)              | 52.78 ± 8.51           | 50.34 ± 7.80            | < 0.0001        | 54.06 ± 8.08            | 52.05 ± 7.73               | < 0.0001        |
| <b>Education level</b> , n (%)  |                        |                         | < 0.0001        |                         |                            | < 0.0001        |
| ≤ Elementary school             | 18,933 (22.92)         | 317 (7.76)              |                 | 6796 (16.84)            | 871 (8.28)                 |                 |
| Middle/high school              | 45,892 (55.57)         | 2132 (52.16)            |                 | 24,037 (59.55)          | 6185 (58.80)               |                 |
| ≥ College                       | 17,763 (21.51)         | 1638 (40.08)            |                 | 9529 (23.61)            | 3462 (32.92)               |                 |
| <b>Drinking habit</b> , n (%)   |                        |                         | < 0.0001        |                         |                            | < 0.0001        |
| Never drinker                   | 47,531 (57.55)         | 1633 (39.96)            |                 | 21,887 (54.23)          | 4757 (45.23)               |                 |
| Ex-drinker                      | 2917 (3.53)            | 216 (5.28)              |                 | 1442 (3.57)             | 479 (4.55)                 |                 |
| Current drinker                 | 32,140 (38.92)         | 2238 (54.76)            |                 | 17,033 (42.20)          | 5282 (50.22)               |                 |
| <b>Smoking habit</b> , n (%)    |                        |                         | < 0.0001        |                         |                            | < 0.0001        |
| Never smoker                    | 64,793 (78.46)         | 2684 (65.67)            |                 | 31,398 (77.79)          | 7496 (71.27)               |                 |
| Ex-smoker                       | 8376 (10.14)           | 849 (20.77)             |                 | 5714 (14.16)            | 2075 (19.73)               |                 |
| Current smoker                  | 9419 (11.40)           | 554 (13.56)             |                 | 3250 (8.05)             | 947 (9.00)                 |                 |
| <b>PA-time</b> (min/week)       | 16.60 ± 37.54          | 57.45 ± 52.18           | < 0.0001        | 367.93 ± 235.37         | 402.54 ± 232.70            | < 0.0001        |
| <b>BMI</b> (kg/m <sup>2</sup> ) | 23.88 ± 3.02           | 23.84 ± 2.77            | 0.33            | 23.92 ± 2.77            | 23.87 ± 2.66               | 0.11            |
| <b>WC</b> (cm)                  | 80.79 ± 8.77           | 81.11 ± 8.47            | < 0.05          | 80.65 ± 8.39            | 80.31 ± 8.32               | < 0.001         |
| <b>SBP</b> (mmHg)               | 121.63 ± 15.63         | 120.83 ± 15.34          | < 0.01          | 122.65 ± 15.53          | 121.47 ± 14.95             | < 0.0001        |
| <b>DBP</b> (mmHg)               | 75.72 ± 10.06          | 76.06 ± 10.32           | < 0.05          | 76.15 ± 9.91            | 75.74 ± 9.70               | < 0.001         |
| <b>T-Chol</b> (mg/dL)           | 198.20 ± 35.47         | 195.82 ± 34.43          | < 0.0001        | 198.75 ± 35.11          | 197.27 ± 34.52             | < 0.001         |
| <b>HDL-C</b> (mg/dL)            | 53.14 ± 12.70          | 53.56 ± 12.49           | < 0.05          | 54.50 ± 13.03           | 55.68 ± 13.57              | < 0.0001        |
| <b>TG</b> (mg/dL)               | 126.39 ± 87.64         | 126.20 ± 86.02          | 0.89            | 120.83 ± 81.08          | 116.22 ± 80.93             | < 0.0001        |
| <b>FBG</b> (mg/dL)              | 94.08 ± 21.01          | 93.20 ± 18.28           | < 0.01          | 95.07 ± 20.66           | 93.79 ± 18.39              | < 0.0001        |
| <b>AST</b> (IU/L)               | 23.26 ± 20.51          | 23.07 ± 9.71            | 0.26            | 23.26 ± 10.27           | 23.44 ± 12.85              | 0.18            |
| <b>ALT</b> (IU/L)               | 21.98 ± 23.16          | 22.58 ± 16.61           | < 0.05          | 21.35 ± 15.63           | 21.54 ± 16.96              | 0.31            |
| <b>Hypertension</b> , n (%)     | 22,444 (27.18)         | 992 (24.27)             | < 0.0001        | 12,188 (30.20)          | 2762 (26.26)               | < 0.0001        |
| <b>DM</b> , n (%)               | 6632 (8.03)            | 289 (7.07)              | < 0.05          | 4103 (10.17)            | 893 (8.49)                 | < 0.0001        |
| <b>FSI</b>                      | 14.89 ± 16.46          | 15.13 ± 16.94           | 0.37            | 14.56 ± 15.57           | 13.64 ± 15.09              | < 0.0001        |
| <b>NAFLD</b> , n (%)            | 15,621 (18.91)         | 787 (19.26)             | 0.59            | 7230 (17.91)            | 1686 (16.03)               | < 0.0001        |

PA, physical activity; RT, resistance training; PA-time, a total time participating regularly in any sports or exercise to the point of sweating; BMI, body mass index; WC, waist circumference; SBP, systolic blood pressure; DBP, diastolic blood pressure; T-Chol, total cholesterol; HDL-C, high-density lipoprotein cholesterol; TG, triglycerides; FBG, fasting blood glucose; AST, aspartate aminotransferase; ALT, alanine aminotransferase; DM, diabetes mellitus; FSI, Framingham steatosis index; NAFLD, nonalcoholic fatty liver disease.

**Table S3.** Odds ratios for NAFLD prevalence according to regularity of RT and sex in participants with high leisure-time PA levels.

|                | N      | RT Levels                |                                           |                    | Model 1<br>OR (95% CI) | Model 2<br>OR (95% CI) | Model 3<br>OR (95% CI) |
|----------------|--------|--------------------------|-------------------------------------------|--------------------|------------------------|------------------------|------------------------|
|                |        | Frequency<br>(days/week) | Training Period<br>(month)    ≥1 year (%) |                    |                        |                        |                        |
| <b>Total</b>   | 50,880 |                          |                                           |                    |                        |                        |                        |
| High-PA        | 40,362 | -                        | -                                         | -                  | 1 (reference)          | 1 (reference)          | 1 (reference)          |
| High-PA+RT     | 10,518 | 4.36 ± 1.57              | 18.59 ± 34.22                             | 81.98              | 0.84 (0.79–0.89)***    | 0.86 (0.81–0.93)***    | 0.87 (0.80–0.94)**     |
| <b>Males</b>   | 16,368 |                          |                                           |                    |                        |                        |                        |
| High-PA        | 12,192 | -                        | -                                         | -                  | 1 (reference)          | 1 (reference)          | 1 (reference)          |
| High-PA+RT     | 4176   | 4.44 ± 1.70 <sup>a</sup> | 21.95 ± 44.04 <sup>a</sup>                | 85.56 <sup>a</sup> | 0.85 (0.79–0.92)***    | 0.81 (0.74–0.89)***    | 0.81 (0.73–0.90)**     |
| <b>Females</b> | 34,512 |                          |                                           |                    |                        |                        |                        |
| High-PA        | 28,170 | -                        | -                                         | -                  | 1 (reference)          | 1 (reference)          | 1 (reference)          |
| High-PA+RT     | 6342   | 4.30 ± 1.48 <sup>a</sup> | 16.38 ± 25.56 <sup>a</sup>                | 79.63 <sup>a</sup> | 0.86 (0.78–0.94)*      | 0.97 (0.87–1.08)       | 0.98 (0.86–1.12)       |

NAFLD, nonalcoholic fatty liver disease; RT, resistance training; PA, physical activity; OR, odds ratio; CI, confidence interval; BMI, body mass index; WC, waist circumference; T-Chol, total cholesterol; ALT, alanine aminotransferase; PA-time, a total time participating regularly in any sports or exercise to the point of sweating; \*,  $p < 0.01$ ; \*\*,  $p < 0.001$ ; \*\*\*,  $p < 0.0001$ ; <sup>a</sup>,  $p < 0.0001$  compared female with male in High-PA+RT. Model 1 was adjusted for age and sex; Model 2 was adjusted for the variables in Model 1, plus drinking, smoking, education level, BMI, and WC; and Model 3 was adjusted for the variables in Model 2, plus T-Chol, ALT, hypertension, diabetes mellitus, and PA-time.
